# Supplementary material
Source: publisher figshare collection journal article supplement (https://sage.figshare.com/ndownloader/files/17059400)
Supplement: Supplementary file 1 [file 17059400]

Table A3: Cabinets formed during the crisis (2009-2015)

| Cabinets (2009-2015)          |             |                       |                                                                                    |
|-------------------------------|-------------|-----------------------|------------------------------------------------------------------------------------|
| Prime Minister                | Party       | Incumbency            | Government                                                                         |
| George A. Papandreou          | PASOK       | 6/10/2009-11/11/2011  | Single party government                                                            |
| Lucas Papademos               | Independent | 11/11/2011-16/05/2012 | National Unity government (PASOK, ND and LAOS until 10/2/2012*)                    |
| Panagiotis Pikrammenos        | Independent | 16/5/2012-20/6/2012   | Caretaker government                                                               |
| Antonis Samaras               | ND          | 20/6/2012-26/1/2015   | Coalition government: ND/PASOK/ DIMAR** (until 21/06/2013)/ NEEL (from 10/06/2014) |
| Alexis Tsipras                | SYRIZA      | 26/1/2015-27/8/2015   | Coalition government: SYRIZA/ ANEL/OP                                              |
| Vasiliki Thanou-Christophilou | Independent | 27/8/2015-21/9/2015   | Caretaker government                                                               |
| Alexis Tsipras                | SYRIZA      | 21/9/2015-            | Coalition government: SYRIZA/ ANEL/OP                                              |

\* LAOS resigned the coalition government after refusing to support the bailout agreement.

\*\*DIMAR resigned the coalition government in protest of the closure of ERT; Greece's national broadcaster.

Table A4: Attitudes towards Greece's membership in the Eurozone

| Party  | No    | Yes   | Remain | Leave | No Opinion |
|--------|-------|-------|--------|-------|------------|
| ND     | 91.14 | 8.81  | 93     | 6     | 1          |
| SYRIZA | 50.59 | 49.41 | 52     | 43    | 6          |
| PASOK  | 90.91 | 9.09  | 78     | 16    | 6          |
| ANEL   | 55.56 | 44.44 | 47     | 47    | 5          |
| POTAMI | 94.29 | 5.71  | 93     | 5     | 2          |
| KKE    | 59.09 | 40.91 | 42     | 51    | 8          |

Source: We use data collected by Public Issue (2015) and by Marantzidis et al.(2017) using two questions:

"if tomorrow a referendum was held on whether or not to exit from the Eurozone what would you vote: YES or NO?" (second and third columns);

and "should Greece Remain in or Leave the Eurozone" (fourth and fifth column). The sixth column concerns mean estimates, whereby the scale is 0 (leave) -10 (should remain).

#### A.5: Description of data used in Figures 1 and 2 of the manuscript.

“Choose4Greece” stands for four Voting Advice Applications (VAAs) especially designed for the legislative elections conducted in May and June 2012 and in January and September 2015. Experts located parties on issue scales identical to those used by voters to position themselves (Konstantinidis et al. 2018; Gemenis et al 2016; Gemenis 2015; Gemenis and Triga 2012). More information about the surveys and each of the datasets can be found at the official website of the “Preference Matcher” consortium, which designed and launched all four surveys: [Preference Matcher datasets](#).

We use two questions from these surveys: First, “Greece should leave the European Union” with answer scale: 1. Completely agree 2. Agree 3. Neither agree nor disagree 4. Disagree 5. Completely disagree. Second, “Financial austerity even if harsh, is necessary to induce economic growth in Greece” with answer scale: 1. Completely agree 2. Agree 3. Neither agree or disagree 4. Disagree 5. Completely disagree. The question was rescaled so that negative attitudes towards austerity correspond to 1 and positive ones to 5.

The economic adjustment programs for Greece, typically referred as ‘bailout packages’ or ‘memorandums’ (MoUs) demanded austerity measures in exchange for bailout funds. These required reductions in government spending (e.g. deep cuts in public wages and pensions) and tax increases. These programs aimed at supporting governments’ efforts towards economic growth. From this perspective the wording of the question combines voters’ perceptions of financial austerity - with the expected outcome - economic growth.

#### References

- Chiaramonte A, and Emanuele V (2017) Party system volatility, regeneration and de-institutionalization in Western Europe (1945–2015). 23(4): 376–388.
- Gemenis K, and Triga V (2012) “Party Positions for the May and June 2012 parliamentary elections in Greece”, *Data Archiving and Networked Services (DANS)*. Persistent Identifier: urn:nbn:nl:ui:13-ngcr-q0.
- Gemenis K, Konstantinidis, I and Triga V (2015). Οι ηλεκτρονικοί σύμβουλοι ψήφου στην Ελλάδα [Voting advice applications in Greece]. *Επιστήμη και Κοινωνία [Science and Society]*. 33: 177-210.
- Gemenis, K (2014) An iterative expert survey approach for estimating parties’ policy positions. *Quality and Quantity* 49(6): 1–16.
- Gemenis K, Konstantinidis I and Triga V (2016) Party positions for the January and September 2015 parliamentary elections in Greece. *Data Archiving and Networked Services (DANS)* doi: 10.17026/dans-x8r-x3aj
- Konstantinidis I, Gemenis K, Georgiadou V, Manavopoulos V, Mendez F, Nezi R and Triga, V (2018) Choose4Greece: Voting Advice Application data for the January and September 2015

parliamentary elections in Greece. GESIS-Leibniz Institute for the Social Sciences.  
doi: <http://dx.doi.org/10.7802/1758>

Lefkofridi Z and Weissenbach K (2019) The Institutionalisation of New Parties in Europe: (How) Does it matter for Success? In Harmel, R. Svasand, L. and Mjelde, H. The Institutionalization and De-Institutionalization of Parties: Comparative Cases, ECPR Press.

Marantzidis (2017) Collective action of indignant citizens in Greece. DOI: 10.7802/1529

Public Issue (2015) Political Barometer 145 June. Available at:  
<http://www.publicissue.gr/en/2768/pol-bar-145-june-2015> (accessed April 19 2017)
